# Supplementary material for: Alterations in bacterial metabolites, cytokines, and mucosal integrity in the caecum of broilers caused by feed additives and host-related factors
Source: PubMed Central journal article supplement (PMC9512067; doi:10.3389/fphys.2022.935870), 2022-09-12
Supplement: DataSheet1.pdf [file DataSheet1.pdf]

## *Supplementary Material*

**Table 3a. *p*-values for the effect of interactions between main factors on caecal histomorphology\***

| Parameters                             | <i>p</i> -value |       |       |       |       |       |       |       |       |       |         |
|----------------------------------------|-----------------|-------|-------|-------|-------|-------|-------|-------|-------|-------|---------|
|                                        | A*T             | A*B   | A*S   | T*B   | T*S   | B*S   | A*T*B | A*T*S | A*B*S | T*B*S | T*B*S*A |
| <b>Caecal morphology</b>               |                 |       |       |       |       |       |       |       |       |       |         |
| CD <sup>1</sup>                        | 0.762           | 0.427 | 0.188 | 0.683 | 0.639 | 0.434 | 0.304 | 0.611 | 0.749 | 0.842 | 0.412   |
| <b>Goblet cell number<sup>2</sup></b>  |                 |       |       |       |       |       |       |       |       |       |         |
| Acidic                                 | 0.193           | 0.557 | 0.181 | 0.119 | 0.879 | 0.993 | 0.928 | 0.080 | 0.997 | 0.764 | 1.000   |
| Mixed                                  | 0.229           | 0.374 | 0.838 | 0.848 | 0.598 | 0.498 | 0.881 | 0.809 | 0.975 | 0.714 | 0.606   |
| Total                                  | 0.124           | 0.241 | 0.570 | 0.742 | 0.784 | 0.552 | 0.869 | 0.529 | 0.982 | 0.869 | 0.700   |
| <b>Goblet cell density<sup>3</sup></b> |                 |       |       |       |       |       |       |       |       |       |         |
| Acidic                                 | 0.355           | 0.434 | 0.304 | 0.088 | 0.358 | 0.597 | 0.780 | 0.357 | 0.824 | 0.870 | 0.774   |
| Mixed                                  | 0.032           | 0.147 | 0.890 | 0.304 | 0.162 | 0.832 | 0.341 | 0.398 | 0.701 | 0.193 | 0.038   |
| Total                                  | 0.049           | 0.095 | 0.940 | 0.429 | 0.160 | 0.680 | 0.298 | 0.395 | 0.648 | 0.421 | 0.081   |

<sup>1</sup> Crypt depth are measured in  $\mu\text{m}$ .

<sup>2</sup> the average number of goblet cells per caecal crypt. Acidic represents the cells that are positive to Alcian blue dye. Mixed represents the cells that are positive to both Alcian blue and PAS dye. Total represents the sum of acidic and mixed goblet cells.

<sup>3</sup> The average number of goblet cells per 100  $\mu\text{m}$  length of the crypt depth. Acidic represents the cells that are positive to Alcian blue dye. Mixed represents the cells that are positive to both Alcian blue and PAS dye. Total represents the sum of acidic and mixed goblet cells.

\* The main factors consist of three age groups (A; day 7, 21 and 35 of age), three dietary treatments (T; control, probiotic and phytobiotic products), two breeds (B; Ross and Cobb) and two sexes (S; male and female). Data were obtained from samples taken from one bird per pen and subjected to ANOVA using GLM procedure with a  $3 \times 3 \times 2 \times 2$  (age, dietary treatment, breed and sex) factorial arrangement of experimental groups.

**Table 3b. The effect of interaction between age and dietary treatment on the density of mixed and total goblet cells\***

| Age    | Dietary treatment | Mixed GC density <sup>1</sup> | Total GC density <sup>1</sup> |
|--------|-------------------|-------------------------------|-------------------------------|
| Day 7  | CO                | 9.1 ± 0.77 <sup>ab</sup>      | 12.9 ± 0.93 <sup>a</sup>      |
|        | PO                | 11.4 ± 1.12 <sup>a</sup>      | 14.8 ± 1.37 <sup>a</sup>      |
|        | PY                | 9.1 ± 0.99 <sup>ab</sup>      | 12.5 ± 1.18 <sup>ab</sup>     |
| Day 21 | CO                | 6.4 ± 0.38 <sup>c</sup>       | 9.5 ± 0.43 <sup>bc</sup>      |
|        | PO                | 6.0 ± 0.33 <sup>c</sup>       | 9.0 ± 0.45 <sup>c</sup>       |
|        | PY                | 5.6 ± 0.45 <sup>c</sup>       | 7.9 ± 0.45 <sup>c</sup>       |
| Day 35 | CO                | 5.6 ± 0.43 <sup>c</sup>       | 7.1 ± 0.53 <sup>c</sup>       |
|        | PO                | 5.6 ± 0.52 <sup>c</sup>       | 7.3 ± 0.61 <sup>c</sup>       |
|        | PY                | 6.7 ± 0.50 <sup>bc</sup>      | 8.3 ± 0.52 <sup>c</sup>       |

<sup>1</sup> The average number of goblet cells per 100 µm length of the crypt depth. Mixed represents the cells that are positive to both Alcian blue and PAS dye. Total represents the sum of acidic (positive to Alcian blue dye) and mixed goblet cells.

<sup>a,b,c</sup> Means with different superscripts in a column differ significantly ( $p < 0.05$ ).

\* Results are reported as means of 24 replicate-pens. Treatment means were separated by the Tukey's HSD post hoc test. Three age groups (day 7, 21 and 35 of age) and three dietary treatments (control, probiotic and phytobiotic products) were included in the analysis.

CO = Control, PO = Probiotic product, PY = Phytobiotic product

**Table 3c. The effect of interaction between age, dietary treatment, breed and sex on the density of mixed goblet cells\***

| Age    | Dietary treatment | Breed | Sex | Mixed GC density           |
|--------|-------------------|-------|-----|----------------------------|
| Day 7  | CO                | RS    | M   | 8.9 ± 1.82 <sup>abcd</sup> |
|        |                   |       | F   | 9.2 ± 1.10 <sup>abcd</sup> |
|        |                   | CB    | M   | 10.8 ± 2.10 <sup>abc</sup> |
|        |                   |       | F   | 7.5 ± 0.15 <sup>bcd</sup>  |
|        | PO                | RS    | M   | 14.8 ± 1.33 <sup>a</sup>   |
|        |                   |       | F   | 10.9 ± 2.55 <sup>abc</sup> |
|        |                   | CB    | M   | 8.9 ± 1.74 <sup>abcd</sup> |
|        |                   |       | F   | 11 ± 2.69 <sup>abc</sup>   |
|        | PY                | RS    | M   | 8.2 ± 1.13 <sup>bcd</sup>  |
|        |                   |       | F   | 13.4 ± 2.59 <sup>ab</sup>  |
|        |                   | CB    | M   | 8.9 ± 1.74 <sup>abcd</sup> |
|        |                   |       | F   | 11 ± 2.69 <sup>abc</sup>   |
| Day 21 | CO                | RS    | M   | 6.8 ± 0.67 <sup>cd</sup>   |
|        |                   |       | F   | 6.6 ± 0.52 <sup>cd</sup>   |
|        |                   | CB    | M   | 8.9 ± 1.74 <sup>abcd</sup> |
|        |                   |       | F   | 11 ± 2.69 <sup>abc</sup>   |
|        | PO                | RS    | M   | 5.7 ± 0.94 <sup>cd</sup>   |
|        |                   |       | F   | 5.9 ± 0.48 <sup>cd</sup>   |
|        |                   | CB    | M   | 8.9 ± 1.74 <sup>abcd</sup> |
|        |                   |       | F   | 11 ± 2.69 <sup>abc</sup>   |
|        | PY                | RS    | M   | 5.3 ± 1.00 <sup>cd</sup>   |
|        |                   |       | F   | 5.8 ± 1.22 <sup>cd</sup>   |
|        |                   | CB    | M   | 8.9 ± 1.74 <sup>abcd</sup> |
|        |                   |       | F   | 11 ± 2.69 <sup>abc</sup>   |
| Day 35 | CO                | RS    | M   | 5.8 ± 1.01 <sup>cd</sup>   |
|        |                   |       | F   | 5.4 ± 0.65 <sup>cd</sup>   |
|        |                   | CB    | M   | 6.1 ± 0.73 <sup>cd</sup>   |
|        |                   |       | F   | 5.3 ± 1.13 <sup>cd</sup>   |
|        | PO                | RS    | M   | 5.7 ± 1.20 <sup>cd</sup>   |
|        |                   |       | F   | 7.3 ± 1.21 <sup>bcd</sup>  |
|        |                   | CB    | M   | 4.4 ± 0.30 <sup>d</sup>    |
|        |                   |       | F   | 4.7 ± 0.75 <sup>cd</sup>   |
|        | PY                | RS    | M   | 7.3 ± 0.94 <sup>bcd</sup>  |
|        |                   |       | F   | 7.2 ± 1.43 <sup>bcd</sup>  |
|        |                   | CB    | M   | 4.4 ± 0.30 <sup>d</sup>    |
|        |                   |       | F   | 4.7 ± 0.75 <sup>cd</sup>   |

<sup>1</sup> The average number of goblet cells per 100 µm length of the crypt depth. Mixed represents the cells that are positive to both Alcian blue and PAS dye.

<sup>a,b,c,d</sup> Means with different superscripts in a column differ significantly ( $p < 0.05$ ).

\* Results are reported as means of 6 replicate-pens. Treatment means were separated by the Tukey's HSD post hoc test. Three age groups (day 7, 21 and 35 of age), three dietary treatments (control, probiotic and phytobiotic products), two breeds (Ross308 and Cobb500) and two sexes (male and female) were included in the analysis. CO = Control, PO = Probiotic product, PY = Phytobiotic product, RS = Ross, CB = Cobb, M = Male, F = Female

**Table 4a. *p*-values for the effect of interactions between main factors on caecal metabolite concentration of broilers\***

| Parameters                     | <i>p</i> -value |       |       |       |       |       |       |       |       |       |         |
|--------------------------------|-----------------|-------|-------|-------|-------|-------|-------|-------|-------|-------|---------|
|                                | A*T             | A*B   | A*S   | T*B   | T*S   | B*S   | A*T*B | A*T*S | A*B*S | T*B*S | T*B*S*A |
| <i>Short chain fatty acids</i> |                 |       |       |       |       |       |       |       |       |       |         |
| Acetate                        | 0.525           | 0.387 | 0.477 | 0.466 | 0.839 | 0.503 | 0.694 | 0.820 | 0.870 | 0.955 | 0.257   |
| Propionate                     | 0.479           | 0.420 | 0.242 | 0.971 | 0.138 | 0.685 | 0.833 | 0.896 | 0.745 | 0.893 | 0.773   |
| i-butyrate                     | 0.413           | 0.191 | 0.229 | 0.668 | 0.620 | 0.477 | 0.328 | 0.089 | 0.669 | 0.341 | 0.266   |
| n-butyrate                     | 0.495           | 0.709 | 0.750 | 0.068 | 0.348 | 0.318 | 0.647 | 0.670 | 0.952 | 0.102 | 0.886   |
| i-valerate                     | 0.850           | 0.690 | 0.804 | 0.649 | 0.541 | 0.867 | 0.303 | 0.393 | 0.591 | 0.831 | 0.750   |
| n-valerate                     | 0.774           | 0.556 | 0.229 | 0.210 | 0.159 | 0.106 | 0.298 | 0.602 | 0.591 | 0.303 | 0.334   |
| Total SCFA <sup>1</sup>        | 0.662           | 0.375 | 0.248 | 0.552 | 0.758 | 0.561 | 0.834 | 0.938 | 0.779 | 0.645 | 0.411   |
| Total BCFA <sup>2</sup>        | 0.489           | 0.241 | 0.482 | 0.880 | 0.486 | 0.697 | 0.369 | 0.098 | 0.842 | 0.749 | 0.425   |
| <i>Lactate</i>                 |                 |       |       |       |       |       |       |       |       |       |         |
| L -lactate                     | 0.948           | 0.604 | 0.249 | 0.775 | 0.920 | 0.768 | 0.505 | 0.825 | 0.672 | 0.294 | 0.119   |
| D -lactate                     | 0.860           | 0.298 | 0.212 | 0.892 | 0.289 | 0.309 | 0.450 | 0.132 | 0.501 | 0.088 | 0.828   |
| Total lactate                  | 0.931           | 0.825 | 0.217 | 0.980 | 0.508 | 0.483 | 0.461 | 0.326 | 0.584 | 0.147 | 0.789   |
| D - to L -lactate ratio        | 0.644           | 0.575 | 0.563 | 0.798 | 0.436 | 0.386 | 0.170 | 0.349 | 0.656 | 0.873 | 0.789   |

<sup>1</sup> Total short chain fatty acid is the sum of acetate, propionate, i-butyrate, n-butyrate, i-valerate and n-valerate.

<sup>2</sup> Total branched chain fatty acid is the sum of i-butyrate and i-valerate.

\* The main factors consist of three age groups (A; day 7, 21 and 35 of age), three dietary treatments (T; control, probiotic and phytobiotic products), two breeds (B; Ross and Cobb) and two sexes (S; male and female). Data were obtained from samples taken from one bird per pen and subjected to ANOVA using GLM procedure with a 3 × 3 × 2 × 2 (age, dietary treatment, breed and sex) factorial arrangement of experimental groups.

**Table 5a. *p*-values for the effect of interactions between main factors on mRNA abundance<sup>1</sup> in the caecum of broilers\***

| Parameters                                 | <i>p</i> -value |       |       |       |       |       |       |       |       |       |         |
|--------------------------------------------|-----------------|-------|-------|-------|-------|-------|-------|-------|-------|-------|---------|
|                                            | A*T             | A*B   | A*S   | T*B   | T*S   | B*S   | A*T*B | A*T*S | A*B*S | T*B*S | T*B*S*A |
| <b><i>Cytokines</i></b>                    |                 |       |       |       |       |       |       |       |       |       |         |
| IL-1 $\beta$                               | 0.226           | 0.818 | 0.096 | 0.667 | 0.615 | 0.791 | 0.690 | 0.061 | 0.756 | 0.970 | 0.916   |
| IL-2                                       | 0.403           | 0.660 | 0.773 | 0.941 | 0.952 | 0.248 | 0.813 | 0.977 | 0.042 | 0.330 | 0.445   |
| IL-4                                       | 0.940           | 0.256 | 0.611 | 0.787 | 0.379 | 0.567 | 0.215 | 0.467 | 0.310 | 0.977 | 0.953   |
| IL-6                                       | 0.760           | 0.689 | 0.883 | 0.805 | 0.648 | 0.476 | 0.800 | 0.211 | 0.962 | 0.668 | 0.685   |
| IL-8                                       | 0.419           | 0.976 | 0.626 | 0.329 | 0.569 | 0.565 | 0.976 | 0.921 | 0.891 | 0.504 | 0.897   |
| IL-10                                      | 0.371           | 0.996 | 0.178 | 0.295 | 0.625 | 0.369 | 0.281 | 0.992 | 0.776 | 0.595 | 0.301   |
| IL-12                                      | 0.477           | 0.974 | 0.292 | 0.531 | 0.260 | 0.797 | 0.483 | 0.795 | 0.449 | 0.942 | 0.208   |
| IL-17 $\alpha$                             | 0.710           | 0.683 | 0.911 | 0.586 | 0.409 | 0.430 | 0.527 | 0.413 | 0.163 | 0.112 | 0.065   |
| IL-18                                      | 0.467           | 0.736 | 0.927 | 0.397 | 0.498 | 0.412 | 0.517 | 0.309 | 0.630 | 0.130 | 0.715   |
| TNF- $\alpha$                              | 0.238           | 0.848 | 0.914 | 0.175 | 0.050 | 0.422 | 0.306 | 0.557 | 0.471 | 0.173 | 0.783   |
| IFN- $\gamma$                              | 0.366           | 0.743 | 0.572 | 0.540 | 0.631 | 0.845 | 0.873 | 0.635 | 0.988 | 0.166 | 0.434   |
| TGF- $\beta$ 2                             | 0.839           | 0.503 | 0.514 | 0.434 | 0.203 | 0.162 | 0.703 | 0.345 | 0.136 | 0.448 | 0.976   |
| <b><i>Gut barrier related proteins</i></b> |                 |       |       |       |       |       |       |       |       |       |         |
| MUC2                                       | 0.274           | 0.842 | 0.137 | 0.241 | 0.577 | 0.145 | 0.057 | 0.049 | 0.815 | 0.766 | 0.411   |
| CLDN5                                      | 0.185           | 0.531 | 0.865 | 0.237 | 0.128 | 0.514 | 0.748 | 0.220 | 0.252 | 0.605 | 0.819   |

<sup>1</sup>IL = interleukin, TNF- $\alpha$  = tumor necrosis factor alpha, IFN- $\gamma$  = interferon gamma, TGF-  $\beta$  = transforming growth factor beta, CLDN5 = Claudin 5 and MUC2 = Mucin 2

\* The main factors consist of three age groups (A; day 7, 21 and 35 of age), three dietary treatments (T; control, probiotic and phytobiotic products), two breeds (B; Ross and Cobb) and two sexes (S; male and female). Data were obtained from samples taken from one bird per pen and subjected to ANOVA using GLM procedure with a 3  $\times$  3  $\times$  2  $\times$  2 (age, dietary treatment, breed and sex) factorial arrangement of experimental groups.

**Table 5b. The effect of interaction between age, dietary treatment and sex on mRNA expression of MUC2 (log<sub>10</sub> copy number per ng of RNA) in the caecum of broilers\***

| Age    | Dietary treatment | Sex | MUC2                          |
|--------|-------------------|-----|-------------------------------|
| Day 7  | CO                | M   | -0.90 ± 0.071 <sup>abc</sup>  |
|        |                   | F   | -0.83 ± 0.115 <sup>ab</sup>   |
|        | PO                | M   | -0.78 ± 0.122 <sup>a</sup>    |
|        |                   | F   | -0.87 ± 0.109 <sup>abc</sup>  |
|        | PY                | M   | -0.82 ± 0.065 <sup>ab</sup>   |
|        |                   | F   | -0.80 ± 0.100 <sup>a</sup>    |
| Day 21 | CO                | M   | -1.04 ± 0.115 <sup>abc</sup>  |
|        |                   | F   | -1.51 ± 0.088 <sup>d</sup>    |
|        | PO                | M   | -1.05 ± 0.087 <sup>abc</sup>  |
|        |                   | F   | -1.11 ± 0.112 <sup>abcd</sup> |
|        | PY                | M   | -1.32 ± 0.059 <sup>cd</sup>   |
|        |                   | F   | -1.26 ± 0.097 <sup>bcd</sup>  |
| Day 35 | CO                | M   | -0.79 ± 0.067 <sup>a</sup>    |
|        |                   | F   | -0.65 ± 0.078 <sup>a</sup>    |
|        | PO                | M   | -0.71 ± 0.074 <sup>a</sup>    |
|        |                   | F   | -0.71 ± 0.068 <sup>a</sup>    |
|        | PY                | M   | -0.66 ± 0.065 <sup>a</sup>    |
|        |                   | F   | -0.66 ± 0.096 <sup>a</sup>    |

<sup>a,b,c,d</sup> Means with different superscripts in a column differ significantly ( $p < 0.05$ ).

\* Results are reported as means of 12 replicate-pens. Treatment means were separated by the Tukey's HSD post hoc test. Three age groups (day 7, 21 and 35 of age), three dietary treatments (control, probiotic and phytobiotic products) and two sexes (male and female) were included in the analysis.

CO = Control, PO = Probiotic product, PY = Phytobiotic product, M = Male, F = Female

**Table 5c. The effect of interaction between age, breed and sex on mRNA abundance of IL-2 (log<sub>10</sub> copy number per ng of RNA) in the caecum of broilers\***

| Age    | Breed | Sex | IL-2                         |
|--------|-------|-----|------------------------------|
| Day 7  | RS    | M   | -5.02 ± 0.046 <sup>bc</sup>  |
|        |       | F   | -4.98 ± 0.054 <sup>b</sup>   |
|        | CB    | M   | -4.97 ± 0.064 <sup>b</sup>   |
|        |       | F   | -5.03 ± 0.052 <sup>bcd</sup> |
| Day 21 | RS    | M   | -4.94 ± 0.056 <sup>b</sup>   |
|        |       | F   | -5.18 ± 0.075 <sup>cd</sup>  |
|        | CB    | M   | -5.21 ± 0.141 <sup>d</sup>   |
|        |       | F   | -5.08 ± 0.068 <sup>bcd</sup> |
| Day 35 | RS    | M   | -4.01 ± 0.035 <sup>a</sup>   |
|        |       | F   | -4.08 ± 0.047 <sup>a</sup>   |
|        | CB    | M   | -4.04 ± 0.053 <sup>a</sup>   |
|        |       | F   | -4.11 ± 0.045 <sup>a</sup>   |

<sup>a,b,c,d</sup> Means with different superscripts in a column differ significantly ( $p < 0.05$ ).

\* Results are reported as means of 18 replicate-pens. Treatment means were separated by the Least Significant Difference test. Three age groups (day 7, 21 and 35 of age), two breeds (Ross and Cobb) and two sexes (male and female) were included in the analysis. RS = Ross, CB = Cobb, M = Male, F = Female

**Table 6. The correlation analysis between bacterial metabolites and mRNA abundance<sup>1</sup> in the caecum of broilers\***

| <b>Correlation coefficients</b> | IL-1 $\beta$ | IL-2   | IL-4   | IL-6   | IL-8   | IL-10  | IL-12  | IL-17 $\alpha$ | IL-18  | TNF- $\alpha$ | IFN- $\gamma$ | TGF- $\beta$ 2 | MUC2   | CLDN5  |
|---------------------------------|--------------|--------|--------|--------|--------|--------|--------|----------------|--------|---------------|---------------|----------------|--------|--------|
| Acetate                         | 0.027        | 0.069  | 0.185  | -0.101 | 0.083  | 0.088  | 0.099  | 0.125          | 0.121  | -0.065        | 0.191         | 0.157          | -0.024 | 0.077  |
| Propionate                      | 0.212        | 0.410  | 0.409  | 0.150  | 0.197  | 0.414  | 0.467  | 0.245          | 0.518  | -0.245        | 0.246         | 0.548          | 0.037  | 0.449  |
| i-butyrate                      | 0.010        | 0.111  | -0.001 | 0.071  | 0.096  | 0.130  | 0.145  | 0.081          | 0.181  | -0.197        | 0.106         | 0.127          | -0.050 | 0.151  |
| n-butyrate                      | 0.038        | 0.129  | 0.236  | 0.016  | 0.120  | 0.227  | 0.162  | 0.151          | 0.188  | -0.130        | 0.220         | 0.191          | -0.008 | 0.178  |
| i-valerate                      | -0.116       | 0.234  | -0.087 | 0.173  | 0.148  | 0.235  | 0.235  | 0.197          | 0.244  | -0.285        | 0.145         | 0.129          | 0.163  | 0.252  |
| n-valerate                      | 0.215        | 0.294  | 0.357  | 0.100  | 0.208  | 0.366  | 0.412  | 0.215          | 0.454  | -0.154        | 0.348         | 0.434          | 0.026  | 0.387  |
| Total SCFA <sup>2</sup>         | 0.058        | 0.181  | 0.264  | -0.027 | 0.146  | 0.232  | 0.235  | 0.200          | 0.243  | -0.159        | 0.249         | 0.283          | -0.003 | 0.212  |
| Total BCFA <sup>3</sup>         | -0.053       | 0.187  | -0.032 | 0.129  | 0.126  | 0.196  | 0.203  | 0.145          | 0.225  | -0.266        | 0.123         | 0.143          | 0.044  | 0.216  |
| L-lactate                       | -0.189       | 0.166  | -0.015 | 0.032  | 0.089  | 0.103  | 0.136  | 0.118          | 0.007  | -0.190        | -0.080        | 0.140          | 0.167  | 0.183  |
| D-lactate                       | -0.324       | 0.073  | -0.179 | 0.106  | 0.033  | 0.020  | -0.020 | 0.012          | -0.130 | -0.209        | -0.227        | -0.023         | 0.126  | 0.072  |
| Total lactate                   | -0.279       | 0.106  | -0.175 | 0.087  | 0.083  | 0.061  | 0.032  | 0.089          | -0.094 | -0.198        | -0.170        | 0.003          | 0.166  | 0.095  |
| D- to L-lactate ratio           | -0.264       | -0.054 | -0.159 | -0.115 | -0.098 | -0.057 | -0.183 | -0.153         | -0.178 | -0.139        | -0.232        | -0.091         | 0.008  | -0.062 |
| <b>p-value</b>                  | IL-1 $\beta$ | IL-2   | IL-4   | IL-6   | IL-8   | IL-10  | IL-12  | IL-17 $\alpha$ | IL-18  | TNF- $\alpha$ | IFN- $\gamma$ | TGF- $\beta$ 2 | MUC2   | CLDN5  |
| Acetate                         | 0.710        | 0.346  | 0.011  | 0.169  | 0.256  | 0.233  | 0.174  | 0.089          | 0.098  | 0.371         | 0.009         | 0.031          | 0.748  | 0.292  |
| Propionate                      | 0.003        | <0.001 | <0.001 | 0.041  | 0.007  | <0.001 | <0.001 | <0.001         | <0.001 | <0.001        | <0.001        | <0.001         | 0.617  | <0.001 |
| i-butyrate                      | 0.887        | 0.128  | 0.984  | 0.333  | 0.189  | 0.077  | 0.047  | 0.270          | 0.013  | 0.007         | 0.148         | 0.083          | 0.500  | 0.038  |
| n-butyrate                      | 0.604        | 0.079  | 0.001  | 0.830  | 0.099  | 0.002  | 0.026  | 0.038          | 0.010  | 0.075         | 0.002         | 0.009          | 0.914  | 0.014  |
| i-valerate                      | 0.113        | <0.001 | 0.236  | 0.018  | 0.042  | <0.001 | <0.001 | 0.007          | <0.001 | 0.001         | 0.047         | 0.079          | 0.028  | <0.001 |
| n-valerate                      | 0.003        | <0.001 | <0.001 | 0.170  | 0.004  | <0.001 | <0.001 | 0.003          | <0.001 | 0.034         | <0.001        | <0.001         | 0.730  | <0.001 |
| Total SCFA                      | 0.429        | 0.013  | <0.001 | 0.716  | 0.045  | <0.001 | <0.001 | 0.006          | <0.001 | 0.029         | <0.001        | <0.001         | 0.971  | 0.003  |
| Total BCFA                      | 0.468        | 0.010  | 0.663  | 0.078  | 0.085  | 0.007  | 0.005  | 0.047          | 0.002  | <0.001        | 0.091         | 0.049          | 0.557  | 0.003  |
| L-lactate                       | 0.010        | 0.025  | 0.843  | 0.666  | 0.231  | 0.170  | 0.068  | 0.112          | 0.931  | 0.010         | 0.284         | 0.060          | 0.026  | 0.013  |
| D-lactate                       | <0.001       | 0.327  | 0.015  | 0.152  | 0.656  | 0.787  | 0.790  | 0.874          | 0.078  | 0.004         | 0.002         | 0.758          | 0.094  | 0.333  |
| Total lactate                   | <0.001       | 0.153  | 0.018  | 0.242  | 0.261  | 0.417  | 0.665  | 0.228          | 0.201  | 0.007         | 0.021         | 0.971          | 0.026  | 0.199  |
| D- to L-lactate ratio           | 0.003        | 0.543  | 0.074  | 0.198  | 0.271  | 0.528  | 0.038  | 0.086          | 0.045  | 0.116         | 0.009         | 0.309          | 0.926  | 0.487  |

<sup>1</sup> IL = interleukin, TNF- $\alpha$  = tumor necrosis factor alpha, IFN- $\gamma$  = interferon gamma, TGF- $\beta$  = Transforming growth factor beta, CLDN5 = Claudin 5 and MUC2 = Mucin 2

<sup>2</sup> Total short chain fatty acid is the sum of acetate, propionate, i-butyrate, n-butyrate, i-valerate and n-valerate concentration.

<sup>3</sup> Total branched chain fatty acid is the sum of i-butyrate and i-valerate concentration.

\* Data were obtained from one broiler chicken per pen (72 pens) at three different ages (day 7, 21 and 35 of age). Birds in these pens were from two commercial breeds (Ross and Cobb) and two sexes (male and female) and received three dietary treatments (control, probiotic and phytobiotic products). All data were analyzed by Spearman's rank correlation analysis.
